# Supplementary material for: Circ_CEA promotes the interaction between the p53 and cyclin-dependent kinases 1 as a scaffold to inhibit the apoptosis of gastric cancer
Source: PubMed Central journal article supplement (PMC9515085; doi:10.1038/s41419-022-05254-1), 2022-09-27
Supplement: 41419_2022_5254_MOESM3_ESM.pdf [file 41419_2022_5254_MOESM3_ESM.pdf]

**A**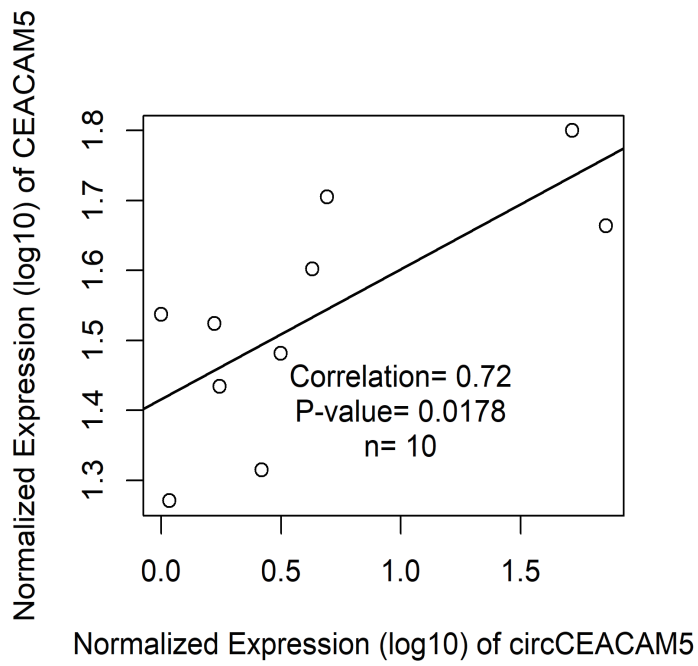**B**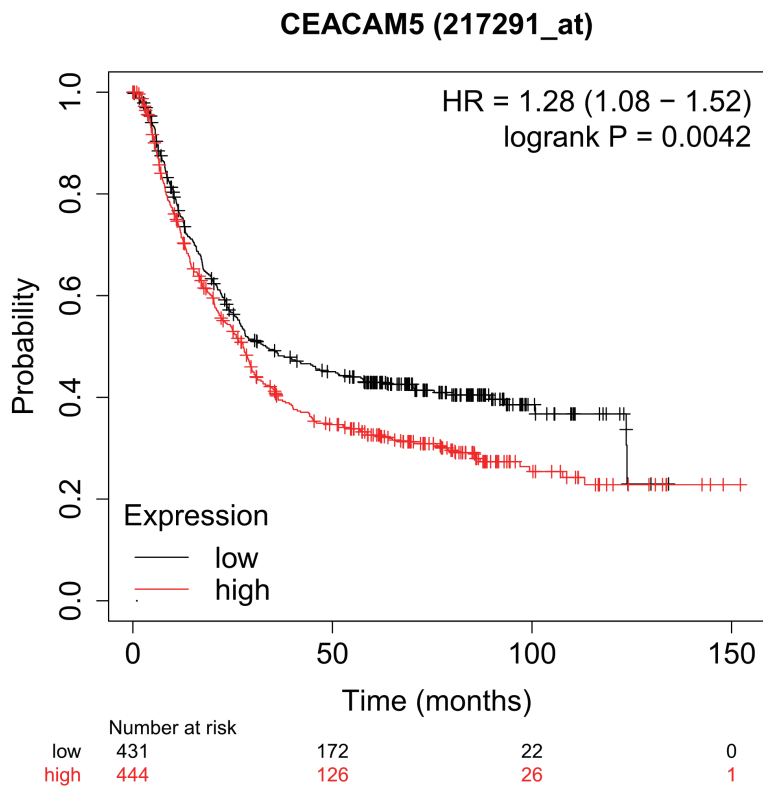**Supplementary figure 1**

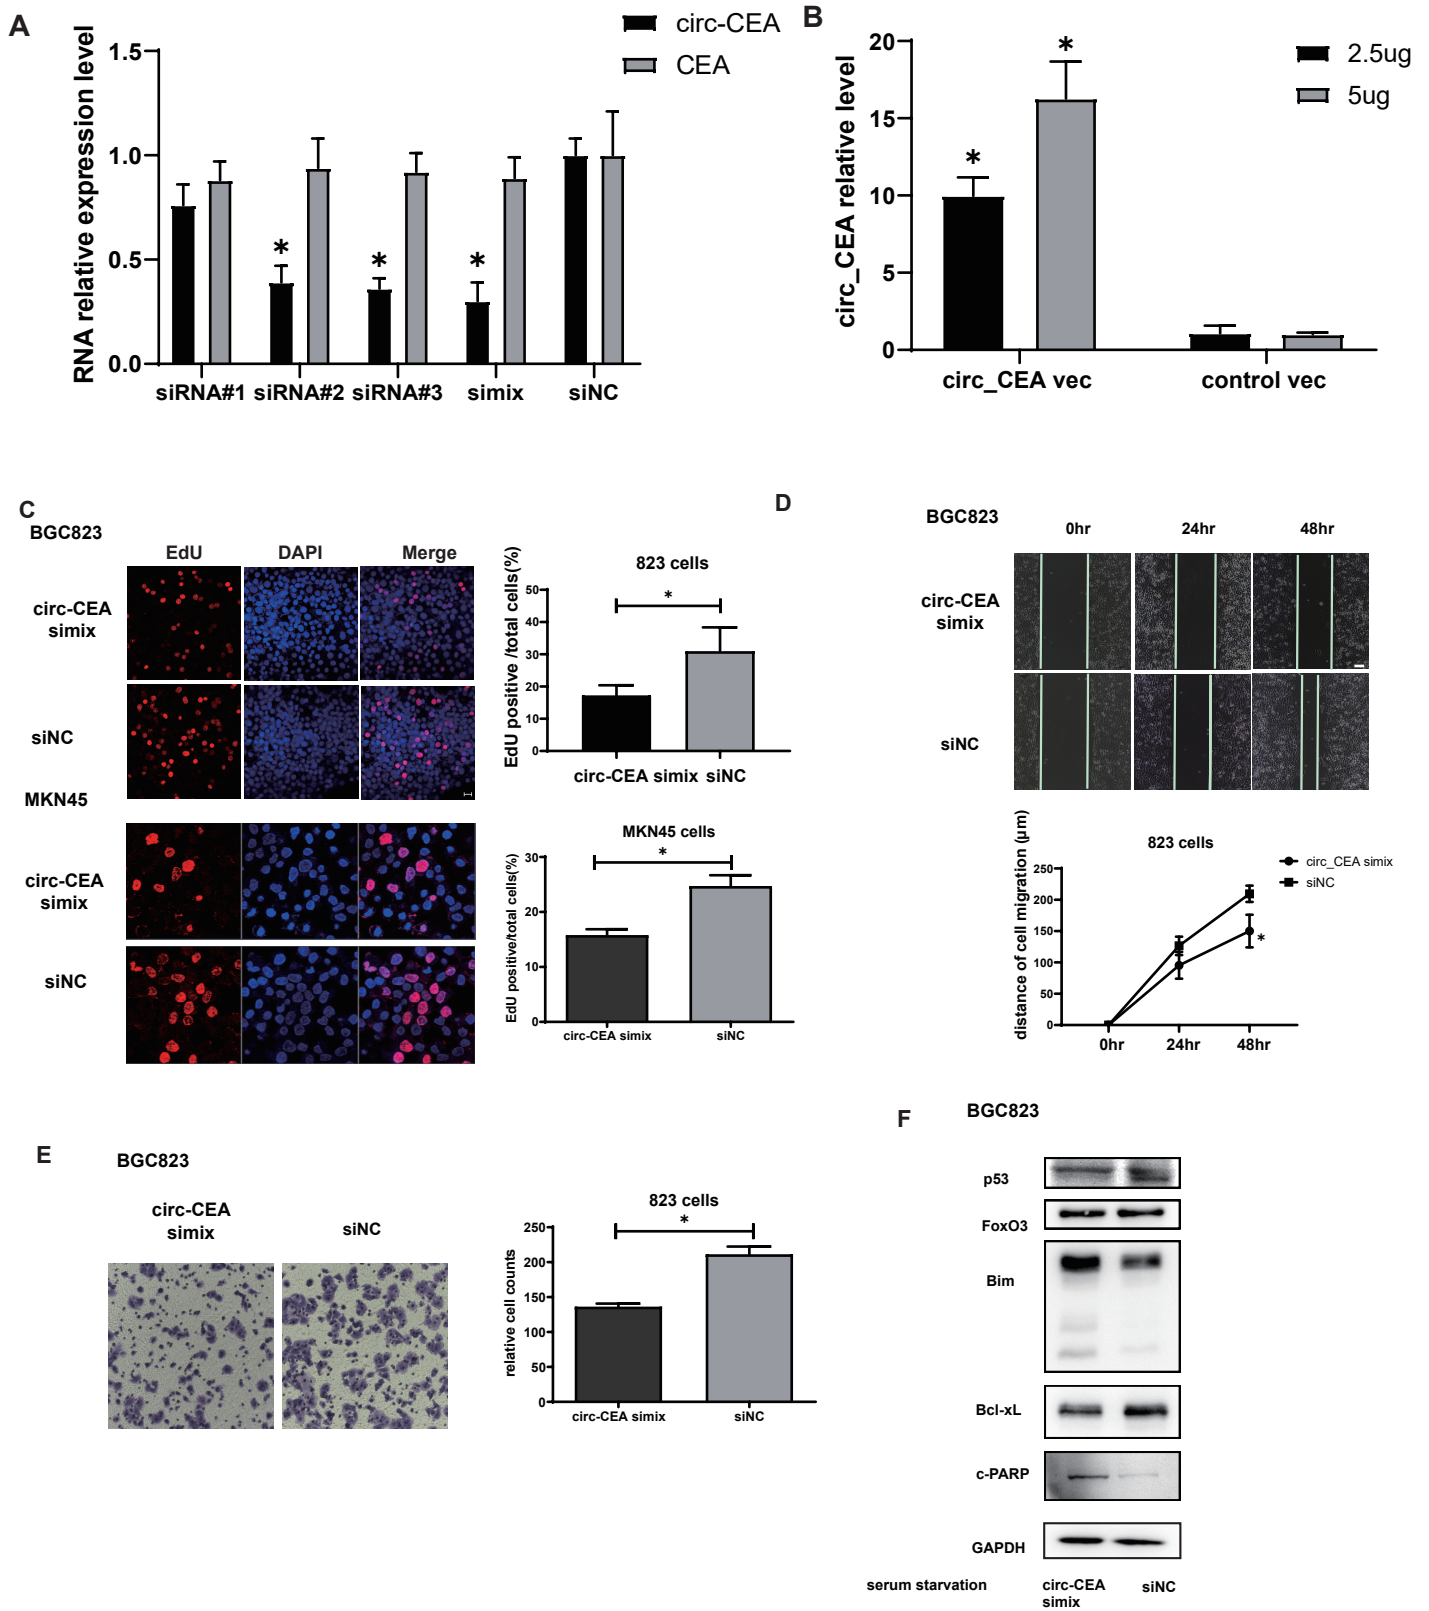

Supplementary figure 2



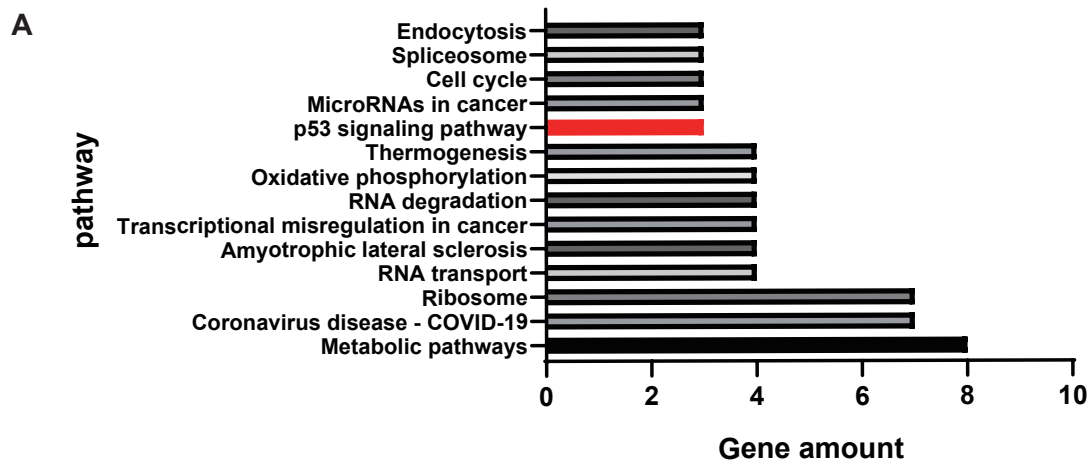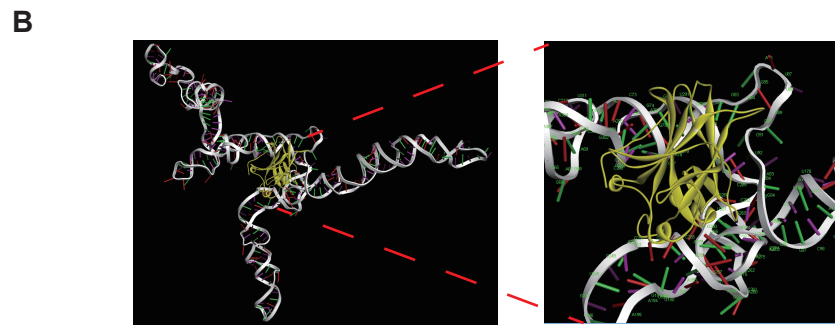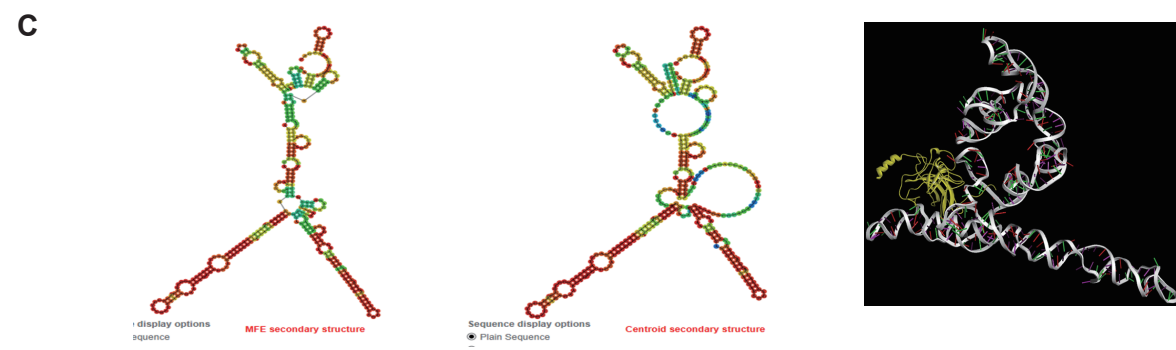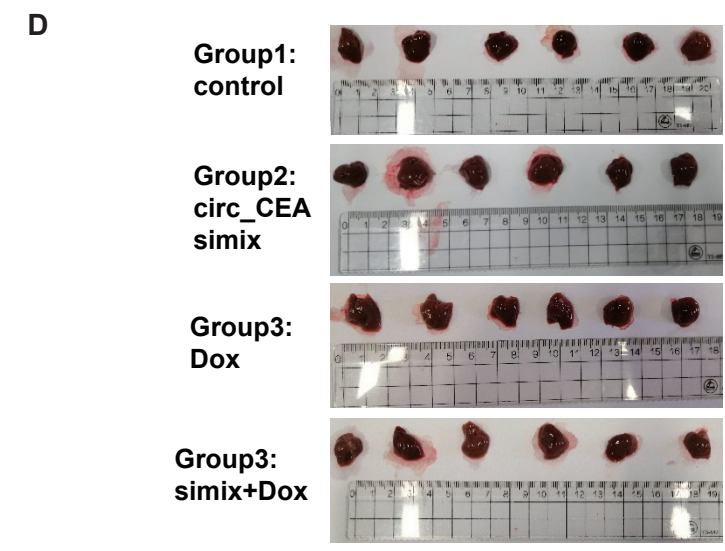

Supplementary figure 3
