# Supplementary material for: Circ_CEA promotes the interaction between the p53 and cyclin-dependent kinases 1 as a scaffold to inhibit the apoptosis of gastric cancer
Source: PubMed Central journal article supplement (PMC9515085; doi:10.1038/s41419-022-05254-1), 2022-09-27

Figure 2F

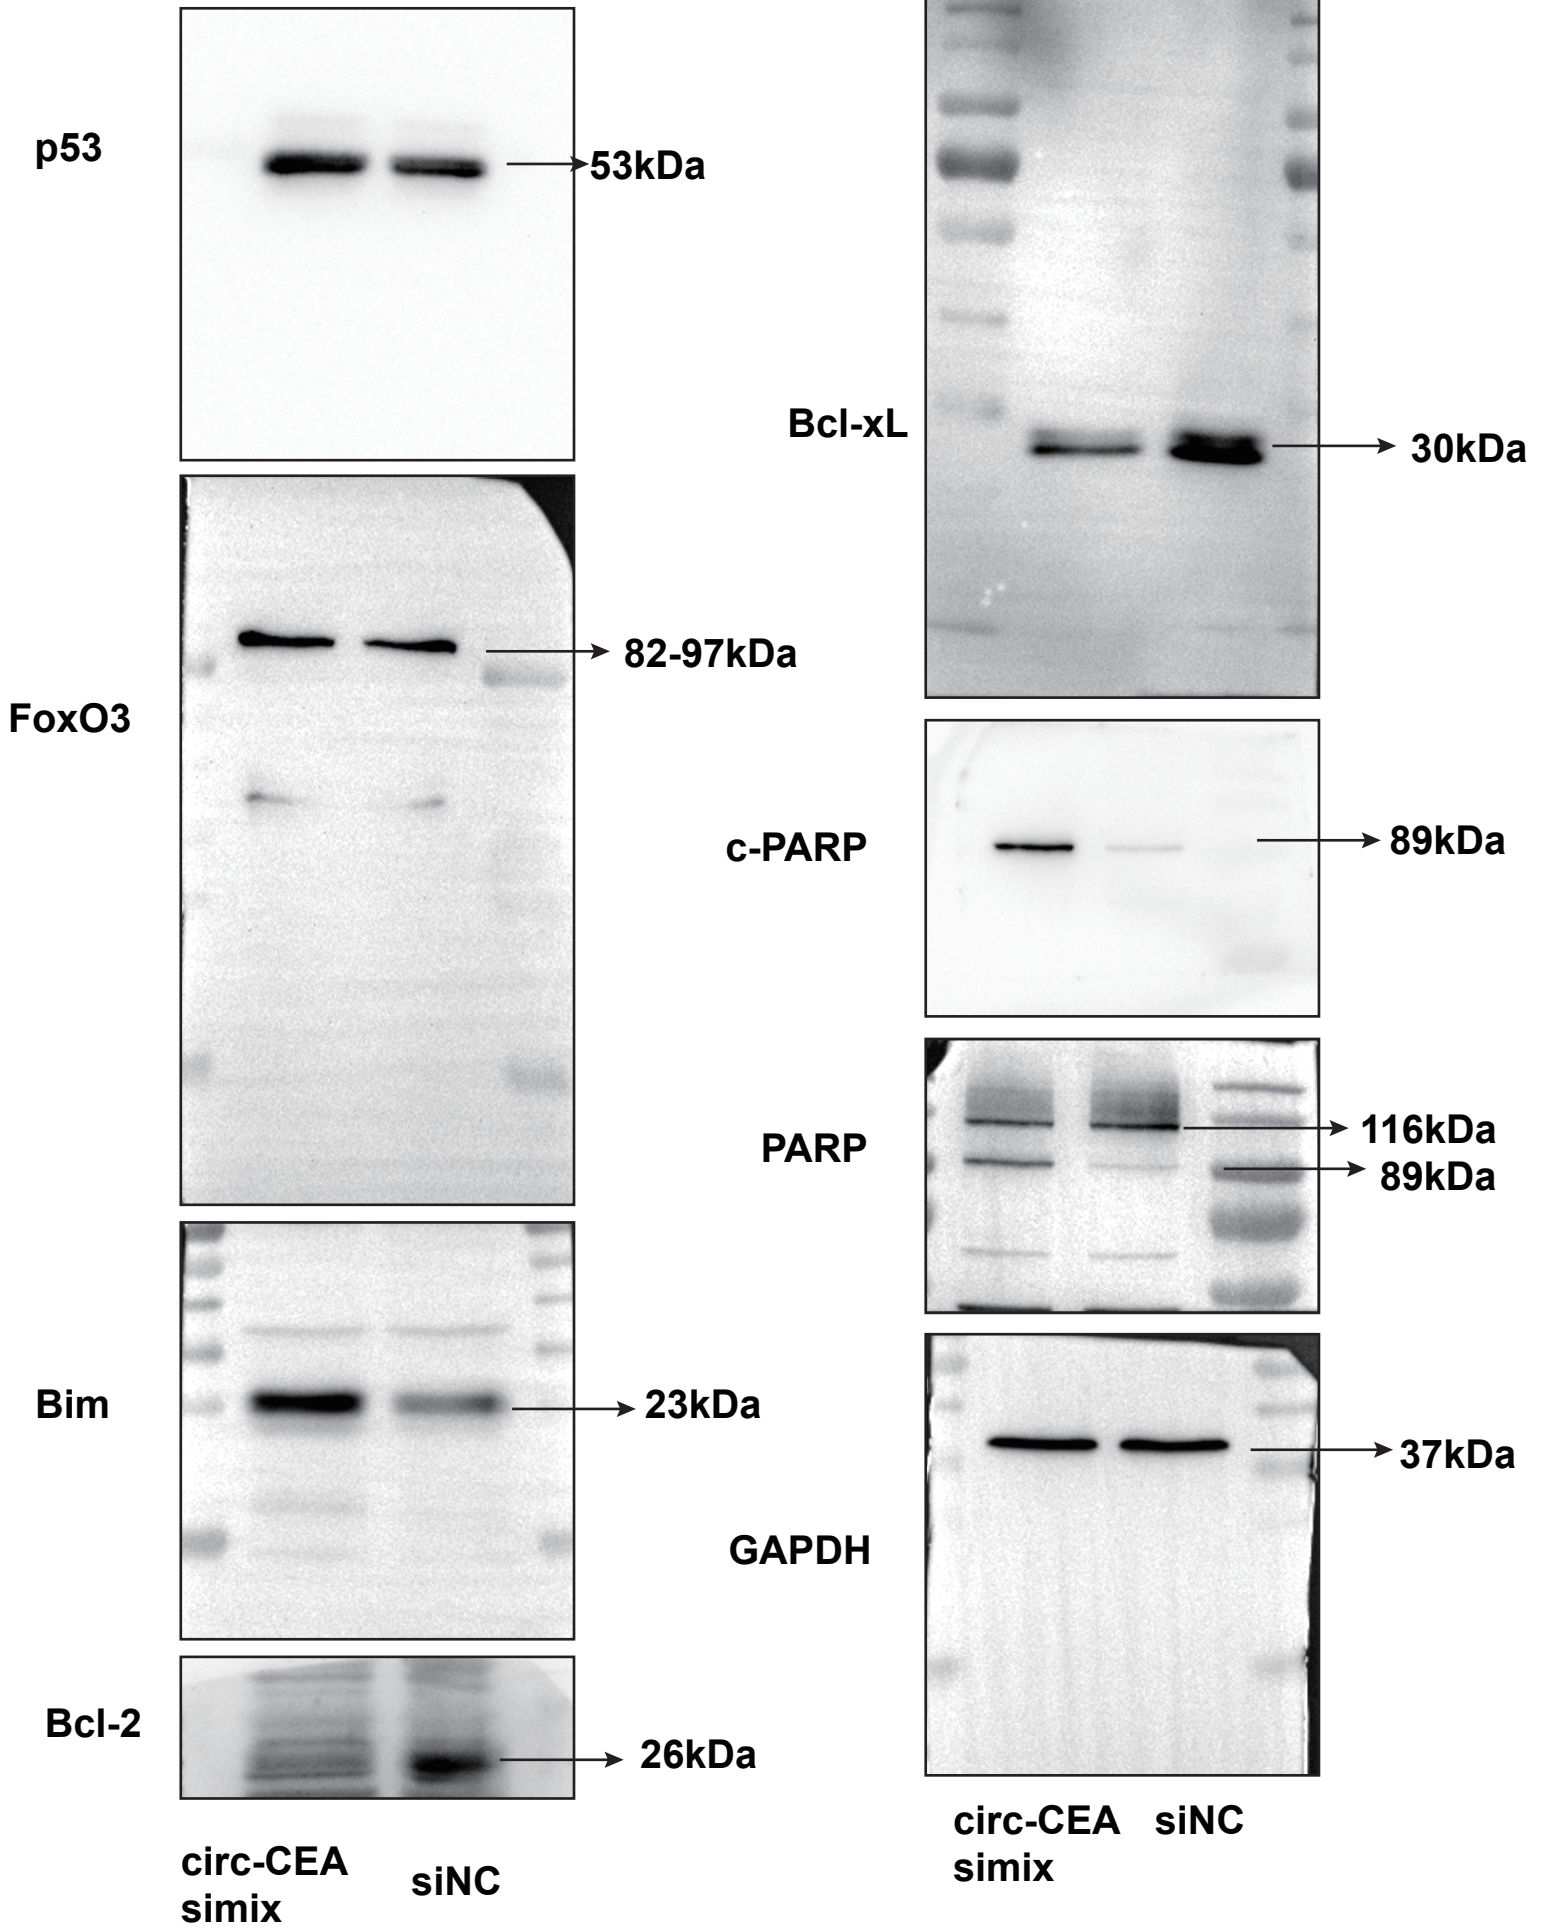

Figure 2F

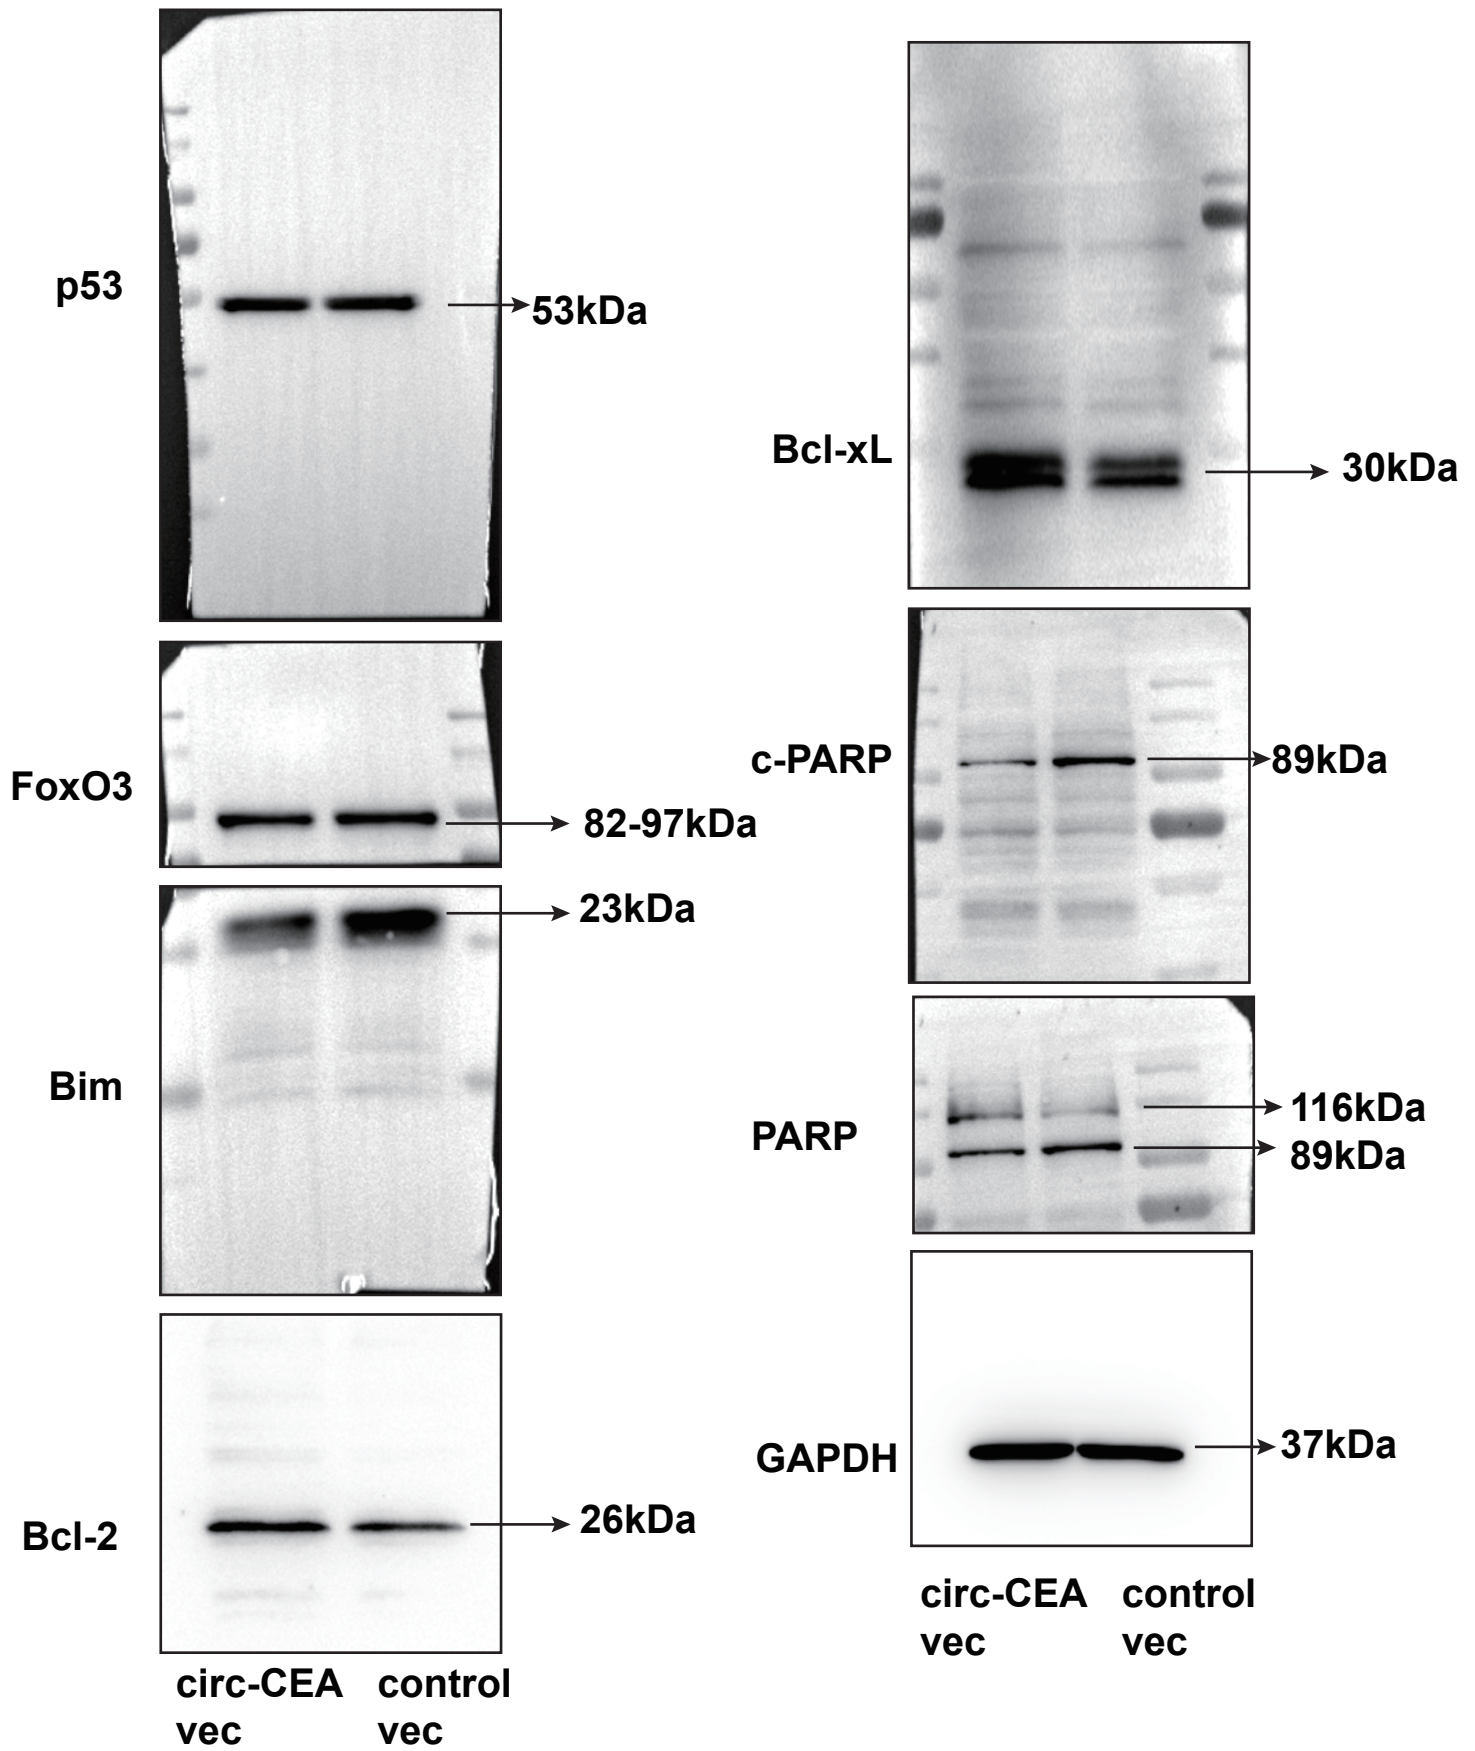



Figure 3E

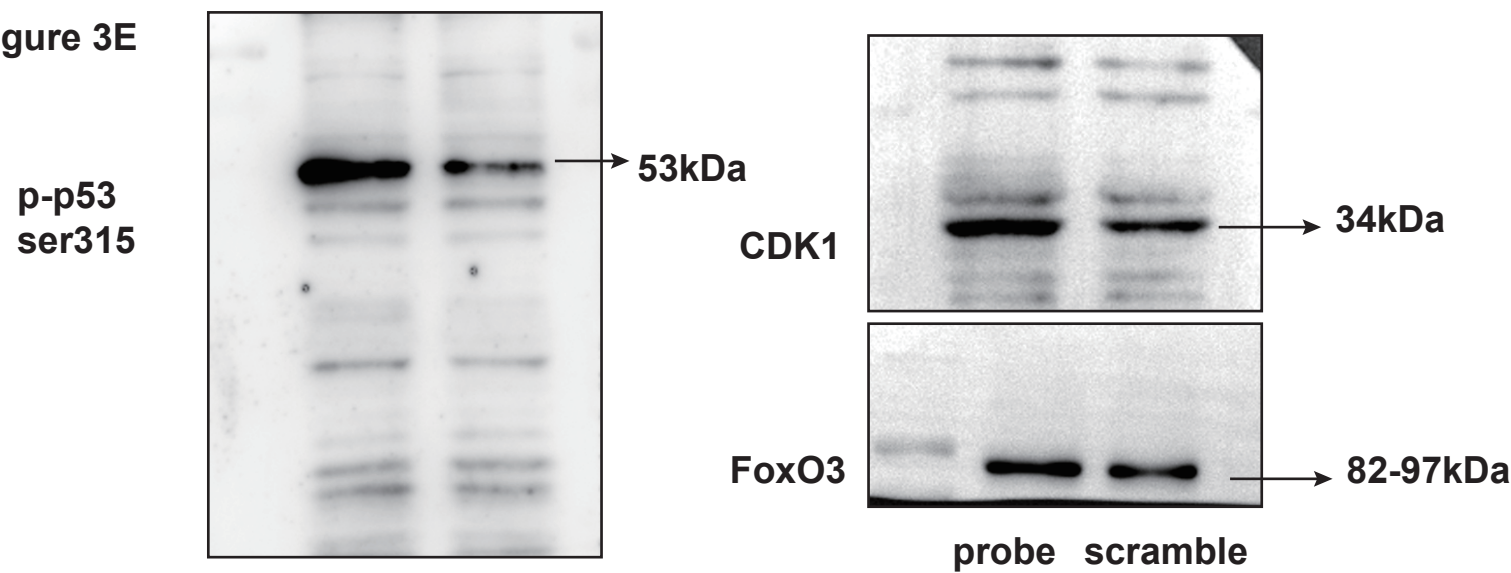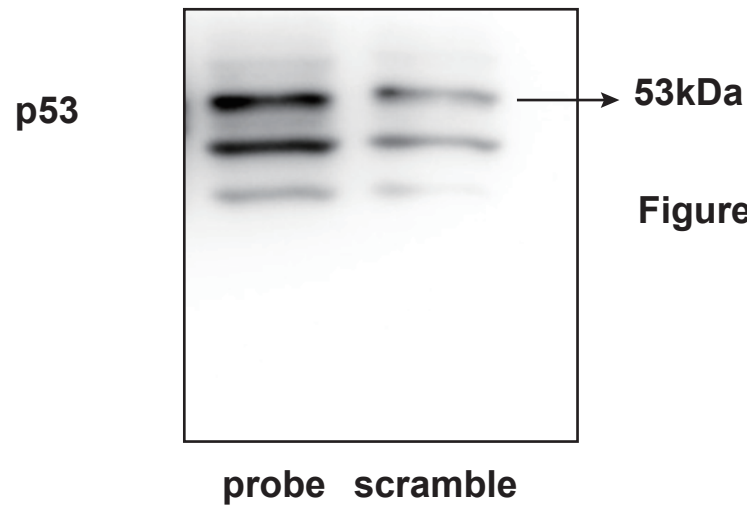

Figure 3H

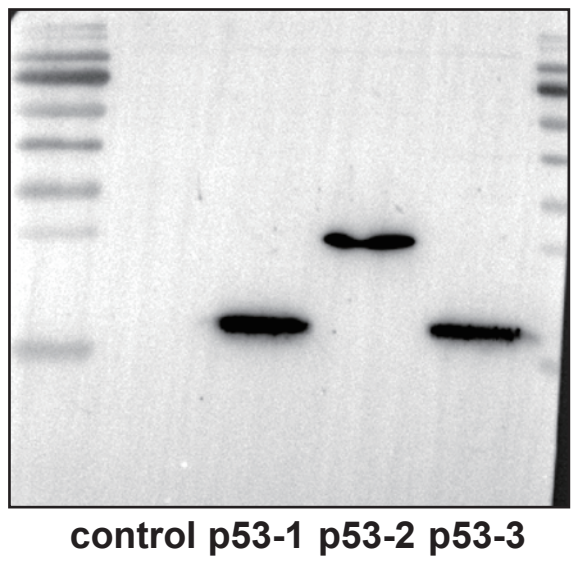

Figure 3I

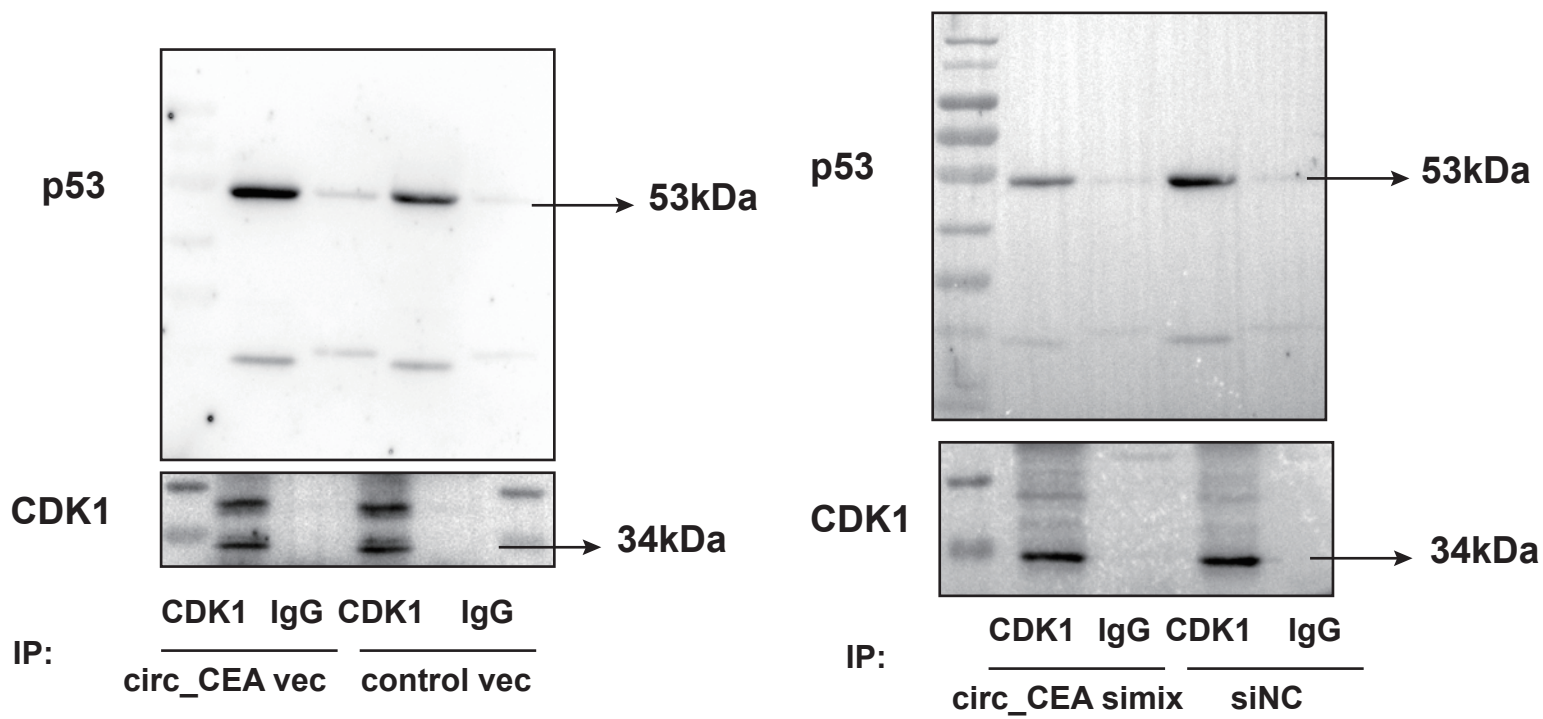

Figure 4A

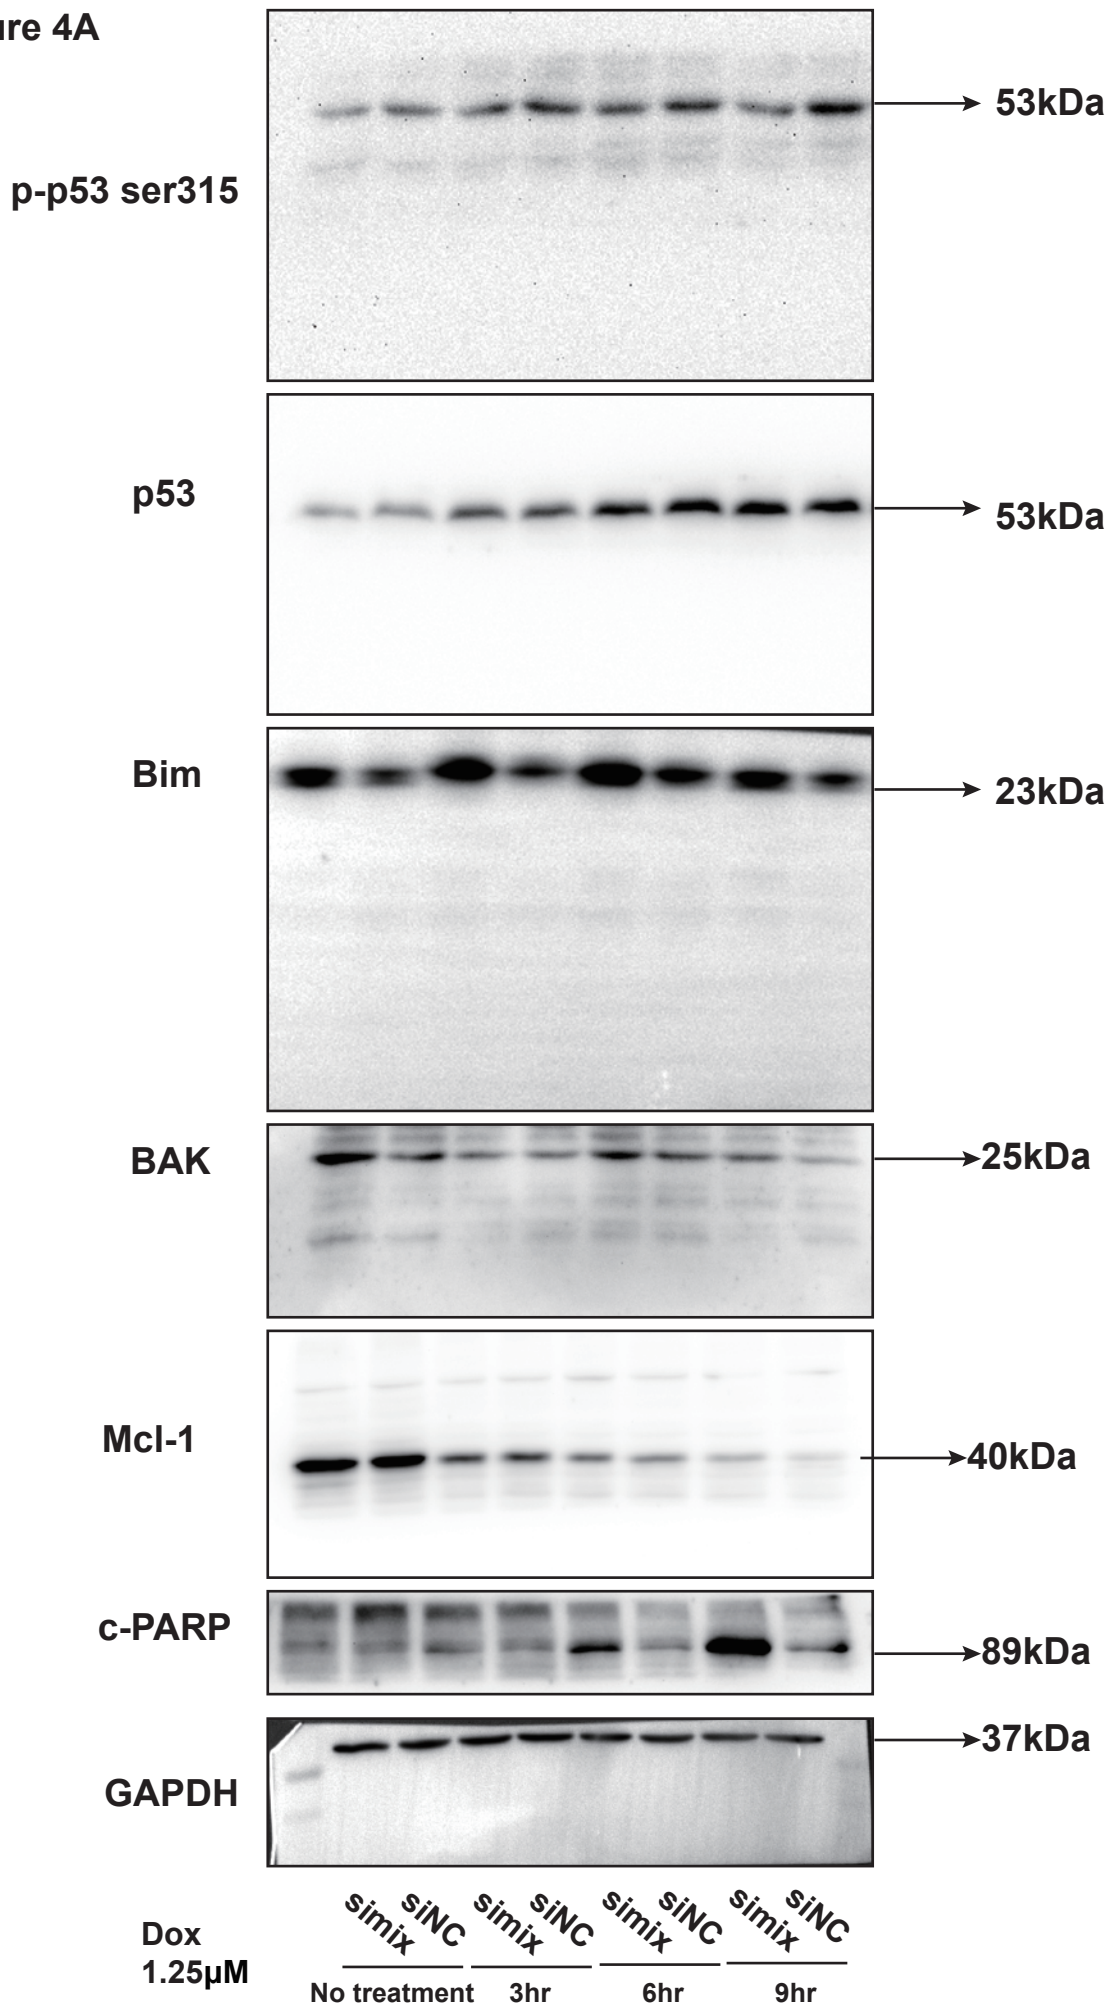



Figure 4B

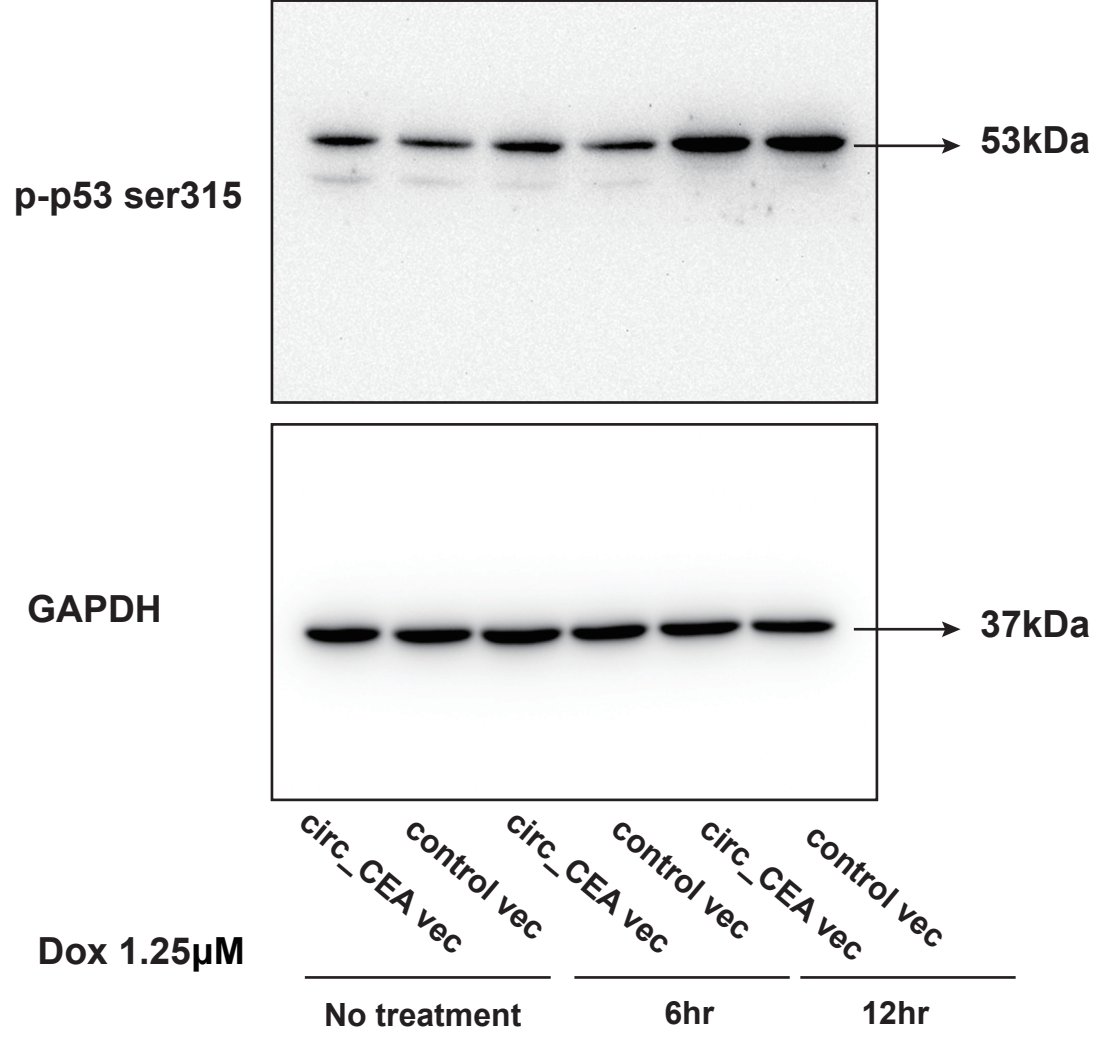

Figure 4C

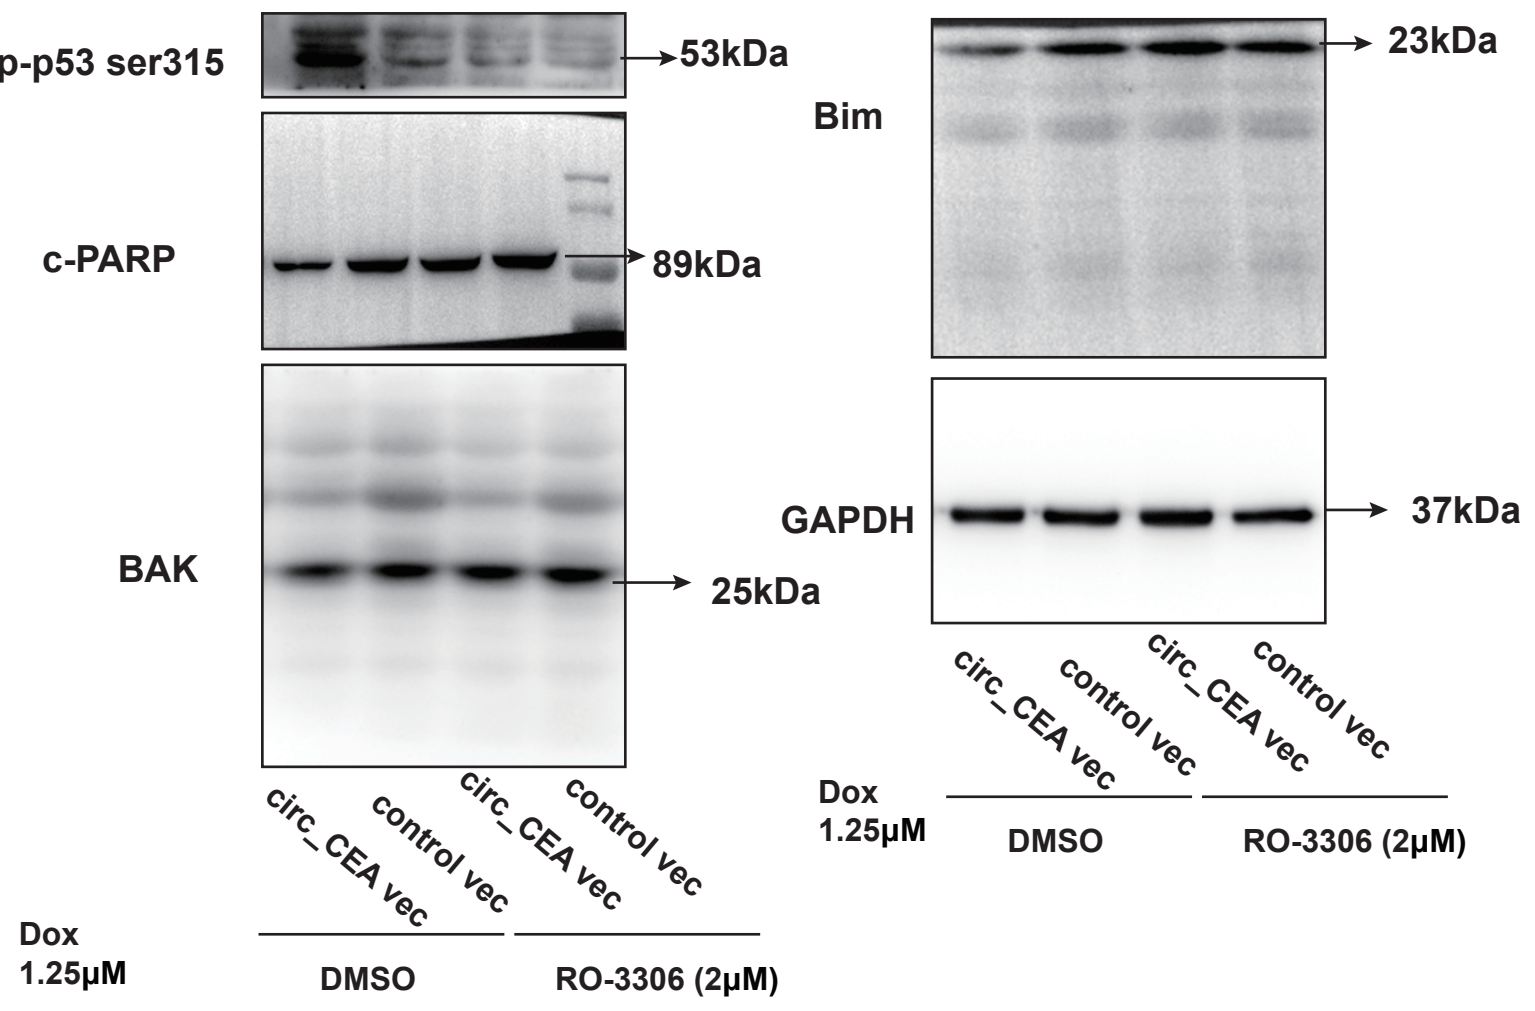

Figure 4D

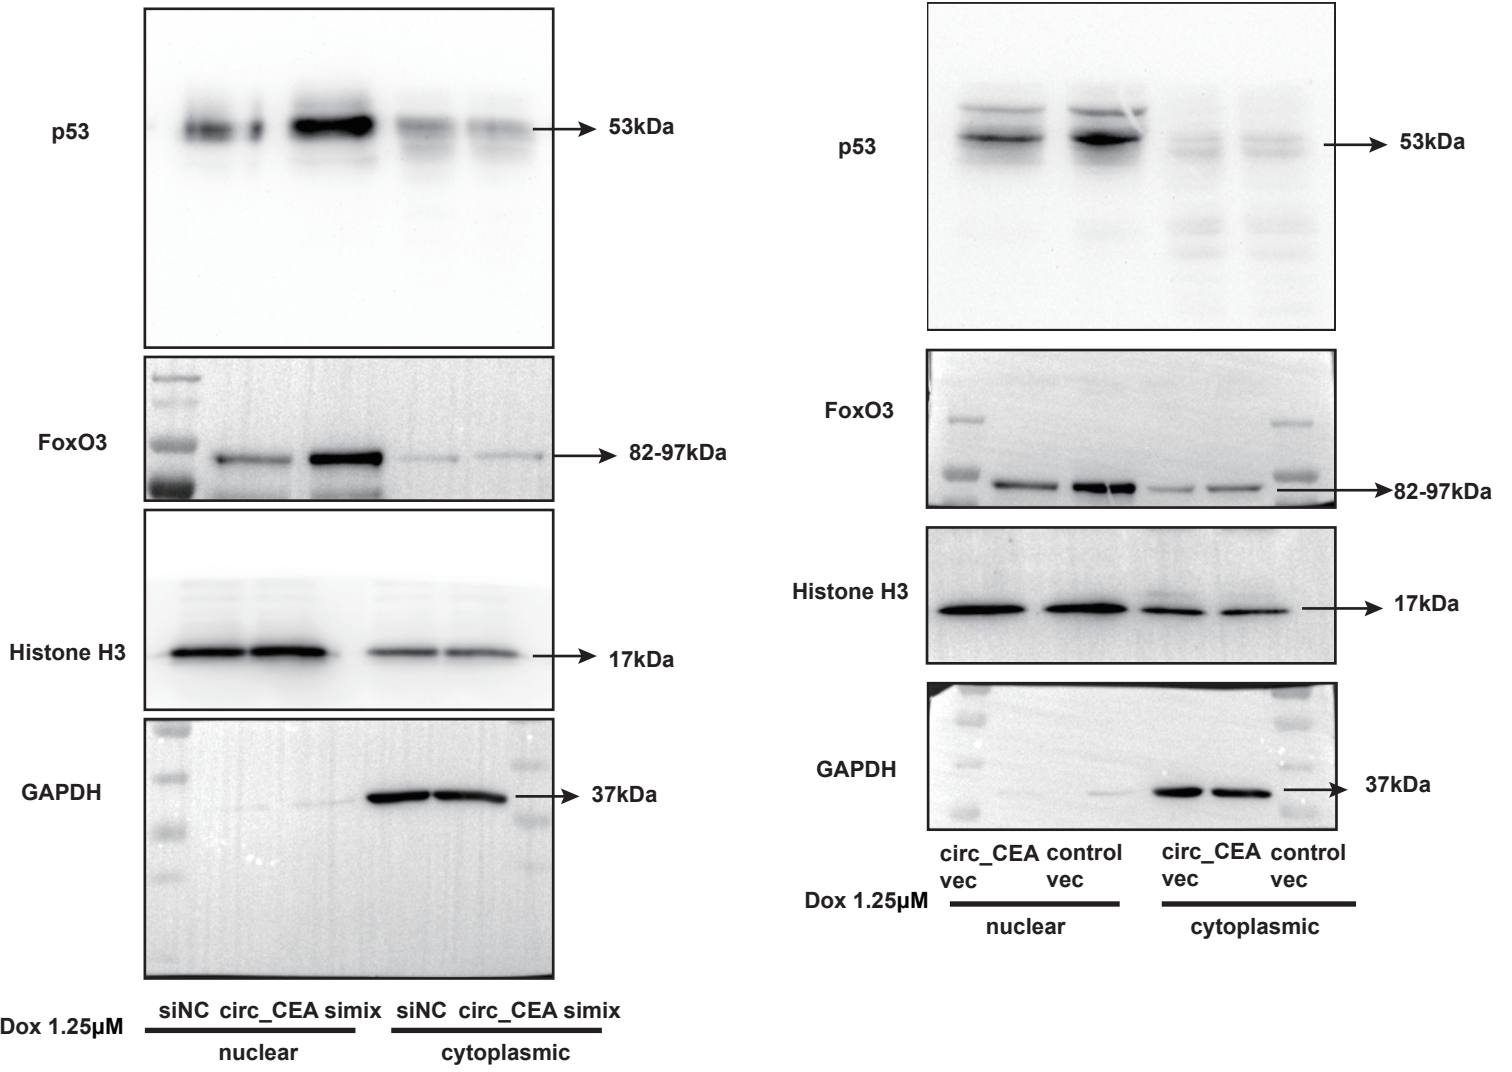



supplementary figure2

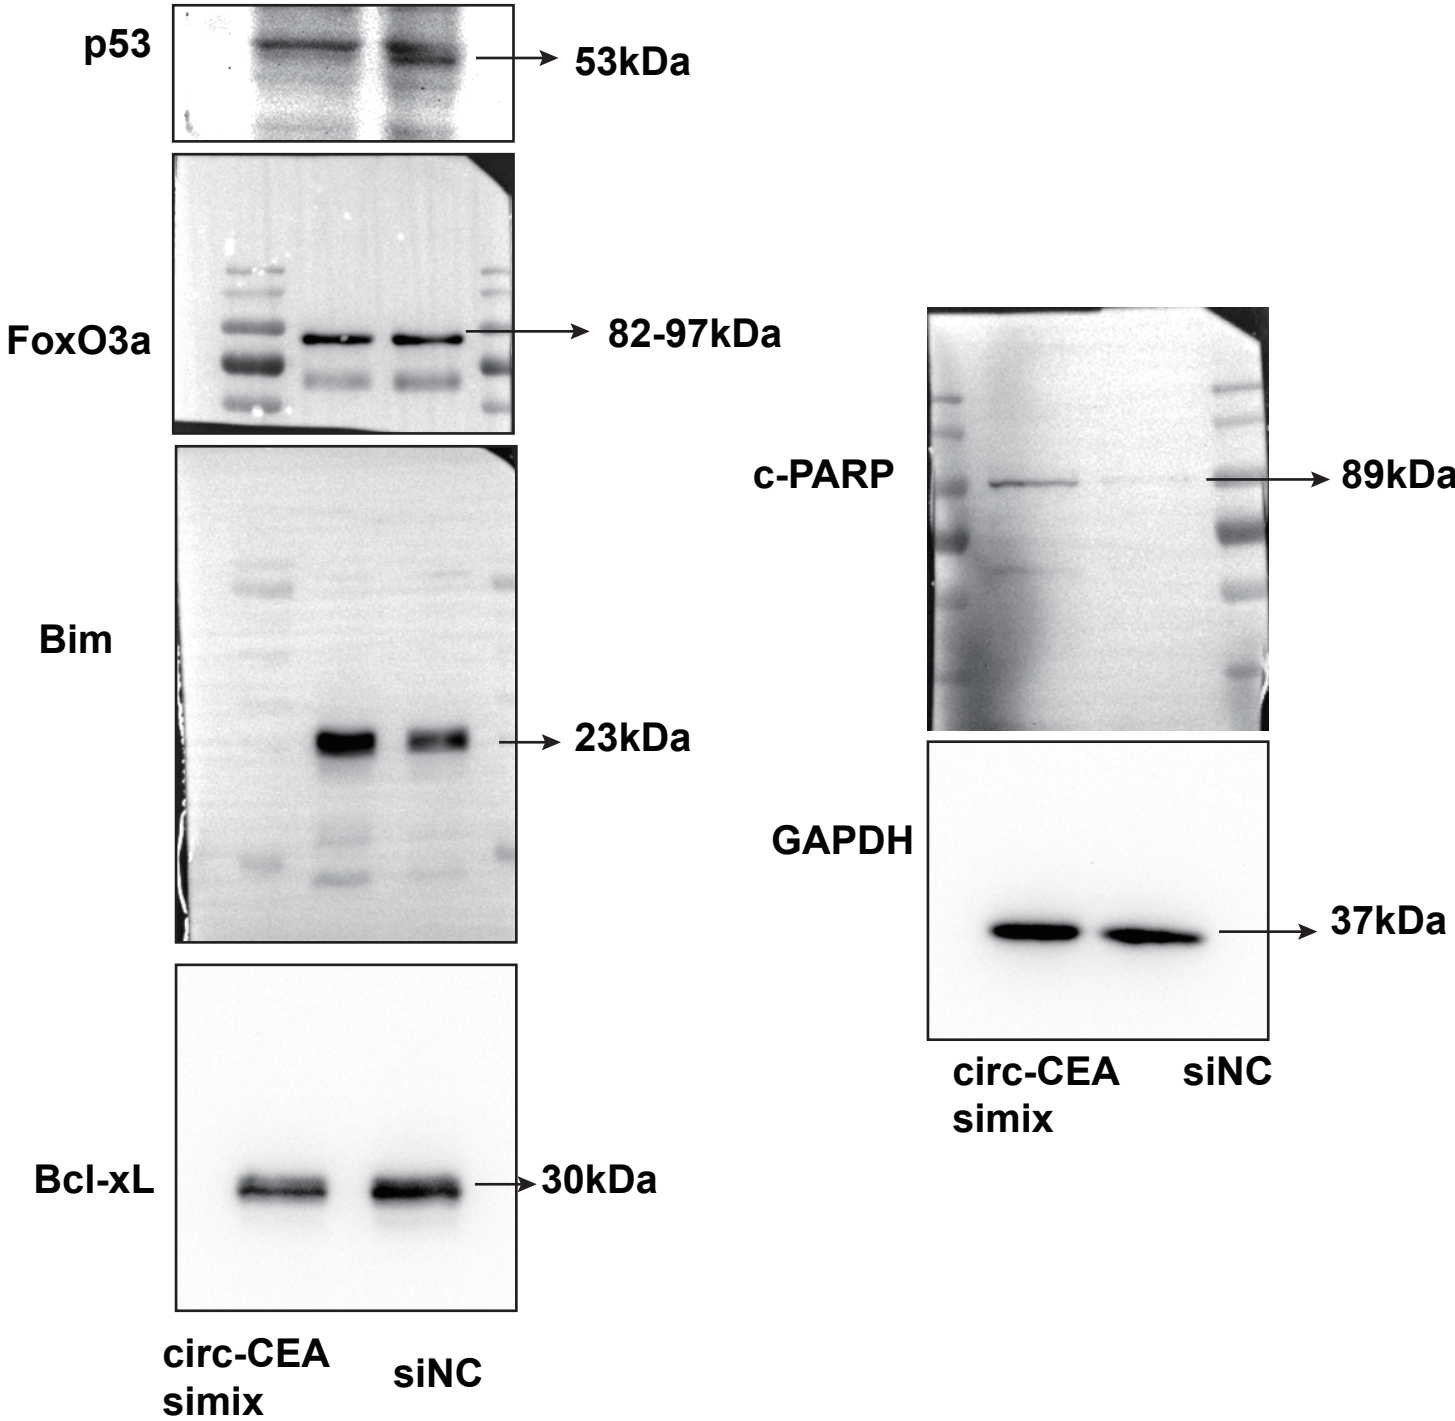

Supplement: 41419_2022_5254_MOESM6_ESM.pdf [file 41419_2022_5254_MOESM6_ESM.pdf]
